# Supplementary material
Source: MDPI journal article supplement (https://www.mdpi.com/2071-1050/10/12/4689)
Supplement: s1 [file s1]

## Car sharers' interest in integrated multimodal mobility platforms: A diffusion of innovations perspective - supplementary materials

This document supplements the article with more detailed results describing preferences in features and functions of an IMM platform. Each item is displayed both with regard to the entire sample (tables a) and as a comparison between the target group and the remaining second group (tables b).

Additionally, the full results of the second regression analysis described in Section 3.2 are given in table 6.

**Table 1a.** "How important are the following pieces of information to you when choosing a route on an IMM platform?"<sup>1</sup>

| Item                                                                                      | <i>M</i> | <i>SD</i> | <i>n</i> |
|-------------------------------------------------------------------------------------------|----------|-----------|----------|
| Duration of entire route                                                                  | 4.50     | 0.81      | 636      |
| Cost of entire route                                                                      | 4.40     | 0.86      | 636      |
| Different combinations of means of transportation                                         | 4.13     | 1.03      | 624      |
| Ability to set individual preferences as a filter (e.g. „I prefer not to take the train“) | 3.75     | 1.14      | 621      |
| Length of entire route                                                                    | 3.70     | 1.10      | 628      |
| Duration of individual sections of a route                                                | 3.45     | 1.13      | 620      |
| Cost of individual sections of a route                                                    | 3.35     | 1.18      | 612      |
| Environmental impact (e.g. CO2 emissions)                                                 | 3.22     | 1.18      | 620      |
| Length of individual sections of a route                                                  | 3.05     | 1.07      | 610      |
| Accessibility                                                                             | 2.39     | 1.23      | 612      |

<sup>1</sup>Note. Scale: 1 = not important at all, 5 = very important. Items sorted by *M*.

**Table 1b.** "How important are the following pieces of information to you when choosing a route on an IMM platform?"<sup>1</sup>

| Item                                                                                      | Target Group (Innovators, Early Adopters and Early Majority) |           |          | Second Group (Late Majority and Laggards) |           |          |
|-------------------------------------------------------------------------------------------|--------------------------------------------------------------|-----------|----------|-------------------------------------------|-----------|----------|
|                                                                                           | <i>M</i>                                                     | <i>SD</i> | <i>n</i> | <i>M</i>                                  | <i>SD</i> | <i>n</i> |
| Duration of entire route                                                                  | 4.57                                                         | 0.74      | 339      | 4.43                                      | 0.90      | 276      |
| Cost of entire route                                                                      | 4.50                                                         | 0.78      | 339      | 4.28                                      | 0.95      | 276      |
| Different combinations of means of transportation                                         | 4.23                                                         | 0.99      | 335      | 4.02                                      | 1.07      | 269      |
| Ability to set individual preferences as a filter (e.g. „I prefer not to take the train“) | 3.91                                                         | 1.04      | 335      | 3.56                                      | 1.24      | 268      |
| Length of entire route                                                                    | 3.78                                                         | 1.08      | 337      | 3.59                                      | 1.12      | 271      |
| Duration of individual sections of a route                                                | 3.46                                                         | 1.08      | 334      | 3.43                                      | 1.21      | 267      |
| Cost of individual sections of a route                                                    | 3.32                                                         | 1.17      | 330      | 3.37                                      | 1.19      | 263      |
| Environmental impact (e.g. CO2 emissions)                                                 | 3.16                                                         | 1.16      | 334      | 3.29                                      | 1.21      | 266      |
| Length of individual sections of a route                                                  | 3.10                                                         | 1.09      | 328      | 2.98                                      | 1.06      | 263      |
| Accessibility                                                                             | 2.40                                                         | 1.25      | 329      | 2.33                                      | 1.20      | 265      |

<sup>1</sup>Note. Scale: 1 = not important at all, 5 = very important.

**Table 2a.** “How important are the following functions and aspects of an IMM platform to you?”<sup>1</sup>

| Item                                                   | <i>M</i> | <i>SD</i> | <i>n</i> |
|--------------------------------------------------------|----------|-----------|----------|
| Display of available car sharing/bike sharing vehicles | 4.30     | 0.93      | 633      |
| Transparency about the use of personal information     | 4.28     | 1.10      | 629      |
| Map view                                               | 4.06     | 0.99      | 626      |
| Navigation mode                                        | 4.06     | 1.09      | 630      |
| Live traffic information                               | 3.73     | 1.10      | 630      |
| Automatic location detection                           | 3.40     | 1.32      | 618      |
| Customer service/help                                  | 3.32     | 1.10      | 620      |
| Information about the area ("what's nearby?")          | 2.62     | 1.13      | 632      |

<sup>1</sup>Note. Scale: 1 = not important at all, 5 = very important. Items sorted by *M*.

**Table 2b.** “How important are the following functions and aspects of an IMM platform to you?”<sup>1</sup>

| Item                                                   | Target Group (Innovators, Early Adopters and Early Majority) |           |          | Second Group (Late Majority and Laggards) |           |          |
|--------------------------------------------------------|--------------------------------------------------------------|-----------|----------|-------------------------------------------|-----------|----------|
|                                                        | <i>M</i>                                                     | <i>SD</i> | <i>n</i> | <i>M</i>                                  | <i>SD</i> | <i>n</i> |
| Display of available car sharing/bike sharing vehicles | 4.42                                                         | 0.85      | 338      | 4.13                                      | 1.01      | 274      |
| Transparency about the use of personal information     | 4.28                                                         | 1.07      | 338      | 4.29                                      | 1.12      | 273      |
| Map view                                               | 4.16                                                         | 0.89      | 335      | 3.93                                      | 1.97      | 270      |
| Navigation mode                                        | 4.21                                                         | 0.99      | 335      | 3.85                                      | 1.18      | 273      |
| Live traffic information                               | 3.85                                                         | 0.99      | 336      | 3.28                                      | 1.01      | 273      |
| Automatic location detection                           | 3.59                                                         | 1.23      | 330      | 3.17                                      | 1.38      | 268      |
| Customer service/help                                  | 3.29                                                         | 1.09      | 332      | 3.35                                      | 1.12      | 268      |
| Information about the area ("what's nearby?")          | 2.72                                                         | 1.13      | 332      | 2.49                                      | 1.13      | 271      |

<sup>1</sup>Note. Scale: 1 = not important at all, 5 = very important.

**Table 3a.** “How important are the following functions and aspects of the booking and payment process on an IMM platform to you?”<sup>1</sup>

| Item                                                               | <i>M</i> | <i>SD</i> | <i>n</i> |
|--------------------------------------------------------------------|----------|-----------|----------|
| Data security                                                      | 4.60     | 0.85      | 620      |
| Ease of usage                                                      | 4.59     | 0.76      | 627      |
| Option to cancel a booking                                         | 4.41     | 0.86      | 626      |
| Using all means of transportation through one registration process | 4.29     | 0.97      | 624      |
| Payment of the entire route                                        | 4.27     | 0.95      | 615      |
| Integration of existing discounts or memberships                   | 4.02     | 1.06      | 623      |
| Anonymity                                                          | 3.96     | 1.16      | 614      |
| Ticket on smartphone (e-ticket)                                    | 3.70     | 1.22      | 619      |
| When to pay (before/after travelling)                              | 3.29     | 1.11      | 617      |

<sup>1</sup>Note. Scale: 1 = not important at all, 5 = very important. Items sorted by *M*.

**Table 3b.** “How important are the following functions and aspects of the booking and payment process on an IMM platform to you?”<sup>1</sup>

| Item                                                               | Target Group (Innovators, Early Adopters and Early Majority) |           |          | Second Group (Late Majority and Laggards) |           |          |
|--------------------------------------------------------------------|--------------------------------------------------------------|-----------|----------|-------------------------------------------|-----------|----------|
|                                                                    | <i>M</i>                                                     | <i>SD</i> | <i>n</i> | <i>M</i>                                  | <i>SD</i> | <i>n</i> |
| Data security                                                      | 4.60                                                         | 0.89      | 332      | 4.62                                      | 0.91      | 273      |
| Ease of usage                                                      | 4.56                                                         | 0.72      | 335      | 4.64                                      | 0.81      | 276      |
| Option to cancel a booking                                         | 4.42                                                         | 0.80      | 336      | 4.38                                      | 0.93      | 274      |
| Using all means of transportation through one registration process | 4.39                                                         | 0.90      | 335      | 4.20                                      | 1.02      | 273      |
| Payment of the entire route                                        | 4.40                                                         | 0.84      | 333      | 4.11                                      | 1.07      | 267      |
| Integration of existing discounts or memberships                   | 4.16                                                         | 1.00      | 336      | 3.84                                      | 1.13      | 272      |
| Anonymity                                                          | 3.80                                                         | 1.21      | 329      | 4.17                                      | 1.07      | 270      |
| Ticket on smartphone (e-ticket)                                    | 4.11                                                         | 1.03      | 333      | 3.20                                      | 1.26      | 271      |
| When to pay (before/after travelling)                              | 3.37                                                         | 1.11      | 335      | 3.21                                      | 1.12      | 268      |

<sup>1</sup>Note. Scale: 1 = not important at all, 5 = very important.

**Table 4a.** “What is your preferred mode of payment?”

| Mode of payment                                        | %  | <i>n</i> (number 1 ranking) |
|--------------------------------------------------------|----|-----------------------------|
| Direct debit mandate                                   | 34 | 204                         |
| Online payment system (e.g. PayPal, Sofortüberweisung) | 25 | 148                         |
| Credit card                                            | 21 | 127                         |
| Bank transfer                                          | 20 | 117                         |

**Table 4b.** “What is your preferred mode of payment?”

|                                                        | Target Group (Innovators, Early Adopters and Early Majority) |                             | Second Group (Late Majority and Laggards) |                             |
|--------------------------------------------------------|--------------------------------------------------------------|-----------------------------|-------------------------------------------|-----------------------------|
| Mode of payment                                        | %                                                            | <i>n</i> (number 1 ranking) | %                                         | <i>n</i> (number 1 ranking) |
| Direct debit mandate                                   | 34                                                           | 109                         | 35                                        | 91                          |
| Online payment system (e.g. PayPal, Sofortüberweisung) | 32                                                           | 103                         | 16                                        | 42                          |
| Credit card                                            | 24                                                           | 76                          | 18                                        | 46                          |
| Bank transfer                                          | 11                                                           | 34                          | 31                                        | 80                          |

**Table 5a.** “Which device(s) would you like to use an IMM platform on? (multiple responses allowed)”

| Device                  | %  | <i>n</i> |
|-------------------------|----|----------|
| Smartphone application  | 70 | 470      |
| Web browser, PC         | 69 | 459      |
| Web browser, smartphone | 28 | 184      |

**Table 5b.** “Which device(s) would you like to use an IMM platform on? (multiple responses allowed)”

|                         | Target Group (Innovators, Early Adopters and Early Majority) |          | Second Group (Late Majority and Laggards) |          |
|-------------------------|--------------------------------------------------------------|----------|-------------------------------------------|----------|
| Device                  | %                                                            | <i>n</i> | %                                         | <i>n</i> |
| Smartphone application  | 87                                                           | 296      | 55                                        | 164      |
| Web browser, PC         | 68                                                           | 234      | 71                                        | 212      |
| Web browser, smartphone | 33                                                           | 114      | 22                                        | 64       |

**Table 6.** Linear regression 2: regression on the intention to adopt.

|                                                            | Criterion variable:<br>intention to adopt IMM platforms |          |         |            |            |
|------------------------------------------------------------|---------------------------------------------------------|----------|---------|------------|------------|
|                                                            | Model 2                                                 |          |         |            |            |
|                                                            | Model 1 <i>B</i>                                        | <i>B</i> | $\beta$ | <i>LCI</i> | <i>UCI</i> |
| Constant                                                   | -0.87**                                                 | -0.62    |         | -1.96      | 0.72       |
| Advantage and personal compatibility                       | 0.82**                                                  | 0.83**   | .63     | 0.74       | 0.92       |
| Observability of usage in the personal environment         | 0.18**                                                  | 0.19**   | .16     | 0.12       | 0.25       |
| Innovativeness                                             | 0.22**                                                  | .23**    | .20     | 0.15       | 0.31       |
| Perceived technology security                              | 0.06                                                    | 0.04     | .03     | -0.03      | 0.12       |
| Ease of learning the usage                                 | 0.01                                                    | 0.03     | .02     | -0.06      | 0.13       |
| Sex                                                        |                                                         | 0.00     | .00     | -0.13      | 0.13       |
| Age                                                        |                                                         | -0.01    | -.06    | -0.01      | 0.001      |
| Number of persons in household                             |                                                         | 0.03     | .05     | -0.003     | 0.06       |
| Living in remote or smaller parish (population under 5000) |                                                         | 0.09     | .02     | -0.21      | 0.39       |
| Living in a town (population 5000 - 20 000)                |                                                         | -0.15    | -.04    | -0.35      | 0.05       |
| Living in a large city (population larger than 100 000)    |                                                         | -0.08    | -.04    | -0.21      | 0.05       |
| Location of house in inner part of town or city            |                                                         | 0.05     | .02     | -0.08      | 0.18       |
| University degree or higher                                |                                                         | 0.12     | .04     | -0.04      | 0.26       |
| Student                                                    |                                                         | 0.07     | .02     | -0.19      | 0.33       |
| Homekeeper                                                 |                                                         | - 0.45*  | -.07    | -0.81      | -0.09      |
| Looking for a job/not working                              |                                                         | 0.04     | .01     | -0.38      | 0.46       |
| Retired                                                    |                                                         | 0.15     | .02     | -0.22      | 0.52       |
| Self-employed                                              |                                                         | -0.06    | -.02    | -0.23      | 0.11       |
| Other                                                      |                                                         | -0.18    | -.02    | -0.63      | 0.28       |
| Working fixed hours                                        |                                                         | 0.06     | .02     | -0.09      | 0.21       |
| Working flexible hours                                     |                                                         | -0.29    | -.04    | -0.70      | 0.12       |
| Working hours both fixed and flexible                      |                                                         | 0.05     | .02     | -0.11      | 0.21       |
| Monthly income below 999€                                  |                                                         | 0.07     | .01     | -0.27      | 0.42       |
| Monthly income 999€ - 2999€                                |                                                         | 0.03     | .01     | -0.15      | 0.21       |
| Monthly income 2999€ - 3999€                               |                                                         | -0.04    | -.01    | -0.24      | 0.16       |
| Monthly income above 4000€                                 |                                                         | -0.13    | -.05    | -0.32      | 0.06       |
| <i>R</i> <sup>2</sup>                                      | .68                                                     | 0.70     |         |            |            |
| Adjusted <i>R</i> <sup>2</sup>                             | .68                                                     | 0.68     |         |            |            |
| <i>F</i>                                                   | 203.56**                                                | 41.61**  |         |            |            |
| $\Delta R^2$                                               |                                                         | .02      |         |            |            |
| $\Delta F$                                                 |                                                         | 1.66*    |         |            |            |

Note. n = 489. LCI/UCI = lower/upper confidence interval (95%). Listwise case deletion.

\*p < .05 \*\*p < .001.
